# Supplementary material for: Tandem mass spectrometry and ion mobility mass spectrometry for the analysis of molecular sequence and architecture of hyperbranched glycopolymers
Source: Royal Society of Chemistry journal article supplement (doi:10.1039/c4an01599a), 2014-12-10
Supplement: c4an01599a1.pdf [file c4an01599a1.pdf]

## Electronic Supplementary Information

*Analyst*

# Tandem mass spectrometry and ion Mobility mass spectrometry for the analysis of molecular sequence and architecture of hyperbranched glycopolymers

**Xiumin Liu,<sup>a</sup> Lydia R. Cool,<sup>a</sup> Kenneth Lin,<sup>b</sup> Andrea M. Kasko<sup>b</sup> and Chrys Wesdemiotis<sup>\*,a</sup>**

---

<sup>a</sup> Department of Chemistry, The University of Akron, Akron, OH 44325-3601, USA. E-mail: [wesdemiotis@uakron.edu](mailto:wesdemiotis@uakron.edu); Fax: +1-330-972-6085; Tel.: +1-330-972-7699.

<sup>b</sup> Department of Bioengineering, University of California, Los Angeles, CA 90095, USA.

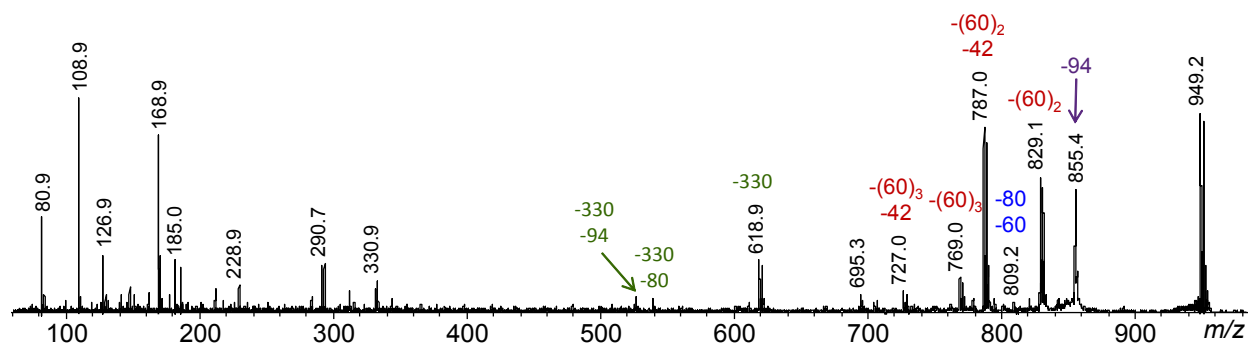

**Fig. S1.** MALDI-MS<sup>2</sup> mass spectrum of sodiated A<sub>1</sub>B<sub>1</sub> (*m/z* 949.2); the numbers on top of the peaks give monoisotopic *m/z* ratios (in black) and the mass of the neutral loss(es) in Da (in color). This spectrum was acquired using MALDI-ToF/ToF instrumentation, with which the entire isotope cluster of the precursor ion is mass-selected. The [M + Na]<sup>+</sup> ion of A<sub>1</sub>B<sub>1</sub> contains one Br atom; fragments containing the Br atom are clearly discernible from the corresponding isotope pattern.

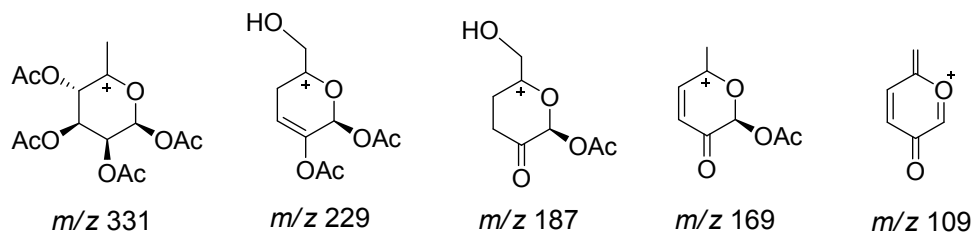

**Fig. S2.** Plausible fragments from the mannose pendants of sodiated glycopolymer *n*-mers, which dominate in the low mass region of the MALDI-MS<sup>2</sup> spectra.

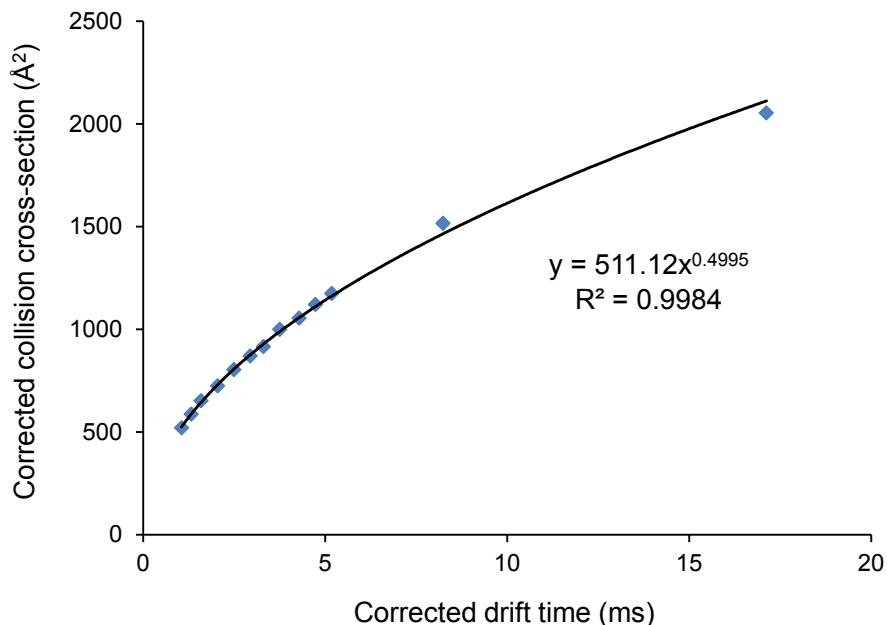

**Fig. S3.** Plot of corrected collision cross-section (CCS') vs. corrected drift time ( $t'_d$ ) for the calibrant ions. Corrected drift times and corrected collision cross-sections were calculated from the drift times measured for the calibrant ions under the IM-MS conditions used for the glycopolymer ( $t_d$ ) and from the reported collision cross-sections of the calibrant ions (CCS),<sup>1</sup> respectively (see Table S1).<sup>2-5</sup> The calibration curve renders a corrected collision cross-section of 1716.8 Å<sup>2</sup> for the glycopolymer tetramer A<sub>2</sub>B<sub>2</sub> ( $t_d = 11.37$  ms;  $t'_d = 11.309$  ms). The actual CCS obtained from this value *via* the equation  $CCS = CCS' \times (z/\mu^{0.5})$  is 327 Å<sup>2</sup> ( $z$  is the ion charge and  $\mu$  is the reduced mass of the ion/drift gas complex). The combined error introduced by the calibration procedure, the uncertainty in the calibrant CCS values and the reproducibility of our drift time measurements is  $\pm <4\%$ .<sup>5</sup>

**Table S1.** Drift times and reported collision cross-sections of the calibrant ions.

| Calibrant ion                    | charge | $m/z$   | $t_d$ (ms) <sup>d</sup> | $t'_d$ (ms) <sup>e</sup> | CCS (Å <sup>2</sup> ) <sup>f</sup> | Reduced mass, $\mu$ <sup>g</sup> | CCS' (Å <sup>2</sup> ) <sup>h</sup> |
|----------------------------------|--------|---------|-------------------------|--------------------------|------------------------------------|----------------------------------|-------------------------------------|
| (Ala) <sub>4</sub> <sup>a</sup>  | 1      | 303.17  | 1.08                    | 1.06                     | 102.9                              | 5.06                             | 521.05                              |
| (Ala) <sub>5</sub> <sup>a</sup>  | 1      | 374.20  | 1.35                    | 1.32                     | 115.0                              | 5.10                             | 587.06                              |
| (Ala) <sub>6</sub> <sup>a</sup>  | 1      | 445.24  | 1.62                    | 1.59                     | 127.0                              | 5.13                             | 651.95                              |
| (Ala) <sub>7</sub> <sup>a</sup>  | 1      | 516.28  | 2.08                    | 2.05                     | 140.5                              | 5.15                             | 724.20                              |
| (Ala) <sub>8</sub> <sup>a</sup>  | 1      | 587.32  | 2.53                    | 2.50                     | 155.5                              | 5.17                             | 804.03                              |
| (Ala) <sub>9</sub> <sup>a</sup>  | 1      | 658.35  | 2.98                    | 2.94                     | 167.9                              | 5.18                             | 870.28                              |
| (Ala) <sub>10</sub> <sup>a</sup> | 1      | 729.39  | 3.34                    | 3.30                     | 176.3                              | 5.19                             | 915.64                              |
| (Ala) <sub>11</sub> <sup>a</sup> | 1      | 800.43  | 3.79                    | 3.75                     | 192.2                              | 5.20                             | 999.86                              |
| (Ala) <sub>12</sub> <sup>a</sup> | 1      | 871.46  | 4.33                    | 4.29                     | 202.4                              | 5.21                             | 1054.38                             |
| (Ala) <sub>13</sub> <sup>a</sup> | 1      | 942.50  | 4.78                    | 4.74                     | 214.9                              | 5.22                             | 1120.81                             |
| (Ala) <sub>14</sub> <sup>a</sup> | 1      | 1013.54 | 5.23                    | 5.19                     | 224.9                              | 5.22                             | 1174.16                             |
| Insulin chain A <sup>b</sup>     | 1      | 2530.52 | 17.19                   | 17.12                    | 390.0                              | 5.26                             | 2052.73                             |
| Cytochrome C <sup>c</sup>        | 7      | 1766.7  | 8.30                    | 8.24                     | 2007.0                             | 5.29                             | 1515.40                             |

<sup>a</sup> [M + H]<sup>+</sup> ions of polyalanine oligomers with the structure H-[HNCH(CH<sub>3</sub>)CO]<sub>n</sub>-OH.

<sup>b</sup> [M + H]<sup>+</sup> of insulin chain A oxidized ammonium salt from bovine pancreas (Sigma-Aldrich).

<sup>c</sup> [M + 7H]<sup>7+</sup> of equine cytochrome C (Sigma-Aldrich).

<sup>d</sup> Using a traveling wave velocity of 350 m/s, a traveling wave height of 10.5 V and a drift gas (N<sub>2</sub>) flow rate of 22.7 mL/min.

<sup>e</sup>  $t'_d = t_d - [C \times (m/z)^{0.5}/1000]$  (C = 1.41 is a correction factor for instrumental flight time effects).

<sup>f</sup> From ref. 1.

<sup>g</sup>  $\mu = [m(\text{ion}) \times \text{mass}(\text{drift gas})] / [\text{mass}(\text{ion}) + \text{mass}(\text{drift gas})]$ .

<sup>h</sup>  $\text{CCS}' = \text{CCS} \times (\mu^{0.5}/z)$ , where z is the ion charge.

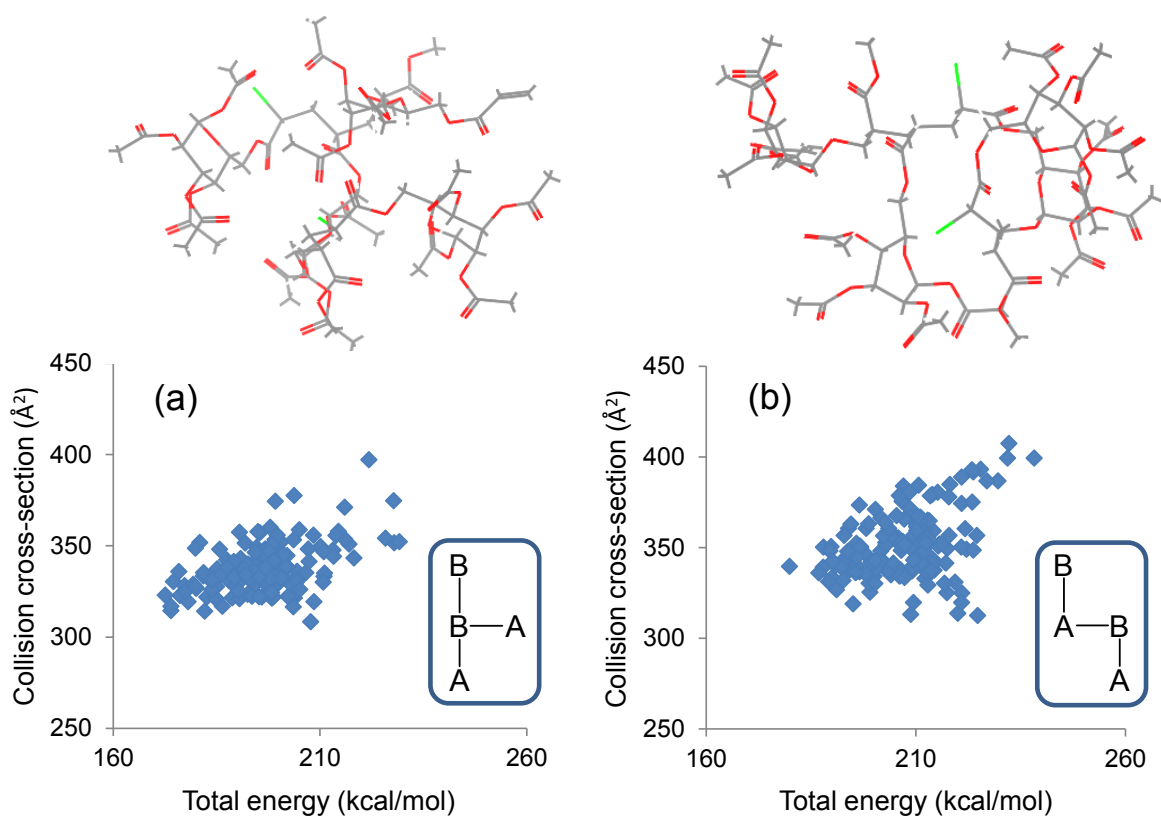

**Fig. S4.** Plot of collision cross-section (CCS) vs. total energy for 150 energy-minimized structures of the glycopolymer 4-mers with the sequence (a) B(B)A<sub>2</sub> and (b) B(A)B(A); representative structures are shown on top of the plots: C is grey, H is white, O is red, and Br is green. The standard deviation of an individual point is (a) 14.1 Å<sup>2</sup> for the B(B)A<sub>2</sub> structures and (b) 18.7 Å<sup>2</sup> for the B(A)B(A) structures. The mean collision cross-section of all 150 structures (and the corresponding mean standard deviation) is (a) 338 (1) Å<sup>2</sup> for B(B)A<sub>2</sub> and (b) 352 (2) Å<sup>2</sup> for B(A)B(A).

## References

1. [http://www.indiana.edu/~clemmer/Research/Cross%20Section%20Database/Peptides/polyaminoacid\\_cs.htm](http://www.indiana.edu/~clemmer/Research/Cross%20Section%20Database/Peptides/polyaminoacid_cs.htm) and [http://www.indiana.edu/~clemmer/Research/Cross%20Section%20Database/Proteins/protein\\_cs.htm](http://www.indiana.edu/~clemmer/Research/Cross%20Section%20Database/Proteins/protein_cs.htm) (accessed on 26 November 2014).
2. B. T. Ruotolo, J. Benesch, A. Sandercock, S.-J. Hyung and C. V. Robinson, *Nat. Protoc.* 2008, **3**, 1139-1152.
3. D. P. Smith, T. W. Knapman, I. Campuzano, R. W. Malham, J. T. Berryman, S. E. Radford and A. E. Ashcroft, *Eur. J. Mass Spectrom.*, 2009, **15**, 113-130.
4. K. Thalassinou, M. Grabenauer, S. E. Slade, G. R. Hilton, M. T. Bowers and J. H. Scrivens, *Anal. Chem.*, 2009, **81**, 248-254.
5. B. C. Katzenmeyer, L.R. Cool, J.P. Williams, K. Craven, J.M. Brown and C. Wesdemiotis, *Int. J. Mass Spectrom.*, 2014, in press (doi: 10.1016/j.ijms.2014.09.021).
